# Supplementary material
Source: PubMed Central journal article supplement (PMC9722621)
Supplement: NIHMS1841059-supplement-1841059_Sup_Info.pdf [file NIHMS1841059-supplement-1841059_Sup_Info.pdf]

## **Bacteriophage genome engineering with CRISPR-Cas13a**

**Table S1. Bacterial strains and phages used in this work.**

| <b>Name</b>              | <b>Description</b>                       | <b>Source/Reference</b>                                                                                     |
|--------------------------|------------------------------------------|-------------------------------------------------------------------------------------------------------------|
| <b>Bacterial strains</b> |                                          |                                                                                                             |
| PAO1                     | <i>P. aeruginosa</i> , wild-type isolate | RefSeq: NC_002516.2 [1]                                                                                     |
| SDM084                   | PAO1 <i>tn7::Lse cas13a</i>              | [2]                                                                                                         |
| BF#                      | <i>P. aeruginosa</i> CF clinical strains | Paul Turner Lab                                                                                             |
| <b>Phages</b>            |                                          |                                                                                                             |
| ΦKZ                      |                                          | Alan Davidson Lab                                                                                           |
| JBD30                    |                                          | Alan Davidson Lab                                                                                           |
| OMKO1                    | Clinical <i>P. aeruginosa</i> phage      | Paul Turner Lab                                                                                             |
| PaMx41                   |                                          | Gabriel Guarneros Peña at Centro de Investigación y de Estudios Avanzados (GenBank Accession No.: KU884563) |

**Table S2. Plasmids.**

| <b>Plasmid</b> | <b>Description</b>                                                                                                                              | <b>Source</b> |
|----------------|-------------------------------------------------------------------------------------------------------------------------------------------------|---------------|
| pHERD30T       | Arabinose inducible, gentamicin resistant ( <i>Gent<sup>R</sup></i> ) shuttle vector                                                            | [3]           |
| pAM383         | Amplification template of <i>acrVIA1</i>                                                                                                        | [4]           |
| pSDM057        | pHERD30T with Version 1 Cas13a crRNA cassette                                                                                                   | [2]           |
| pSDM180        | pHERD30T with Version 2 Cas13a crRNA cassette                                                                                                   | This study    |
| pSDM177        | pHERD30T with Version 3 Cas13a crRNA cassette                                                                                                   | This study    |
| pJG003         | pHERD30T with $\Phi$ KZ <i>orf93-mNeonGreen</i>                                                                                                 | This study    |
| pJG021         | pHERD30T with HDR cassette to insert <i>acrVIA1</i> downstream of $\Phi$ KZ <i>orf120</i>                                                       | This study    |
| pJG025         | pHERD30T with HDR cassette to fuse $\Phi$ KZ <i>orf54</i> with <i>mCherry</i> at the N terminus                                                 | This study    |
| pJG030         | pHERD30T with $\Phi$ KZ <i>orf54</i> at the NheI site and <i>orf120</i> -crRNA                                                                  | This study    |
| pJG031         | pHERD30T with HDR cassette to substitute $\Phi$ KZ <i>orf54</i> with <i>acrVIA1</i>                                                             | This study    |
| pJG033         | pHERD30T with $\Phi$ KZ <i>orf54</i>                                                                                                            | This study    |
| pJG039         | pHERD30T with operon#24 at the NheI site and <i>orf120</i> -crRNA                                                                               | This study    |
| pJG040         | pHERD30T with HDR cassette to insert <i>acrVIA1</i> upstream of $\Phi$ KZ <i>orf54</i> or the OMKO1 shell gene                                  | This study    |
| pJG041         | pHERD30T with HDR cassette to insert a barcode and <i>acrVIA1</i> downstream of the OMKO1 capsid gene                                           | This study    |
| pJG050         | pHERD30T with HDR cassette to substitute $\Phi$ KZ <i>orf146</i> with <i>acrVIA1</i>                                                            | This study    |
| pJG053         | pHERD30T with HDR cassette to substitute $\Phi$ KZ <i>orf241</i> with <i>acrVIA1</i>                                                            | This study    |
| pJG055         | pHERD30T with HDR cassette to fuse $\Phi$ KZ <i>orf54</i> with <i>gfp11</i> at the N terminus using a short linker                              | This study    |
| pJG069         | pHERD30T with HDR cassette to substitute $\Phi$ KZ <i>orf39</i> with <i>acrVIA1</i>                                                             | This study    |
| pJG071         | pHERD30T with HDR cassette to substitute $\Phi$ KZ <i>orf241</i> and <i>orf242</i> with <i>acrVIA1</i>                                          | This study    |
| pJG073         | pHERD30T with HDR cassette to fuse $\Phi$ KZ <i>orf54</i> with <i>gfp11</i> at the N terminus using a long linker                               | This study    |
| pJG074         | pHERD30T with HDR cassette to substitute $\Phi$ KZ <i>orf93</i> with <i>acrVIA1</i>                                                             | This study    |
| pJG075         | pHERD30T with HDR cassette to substitute PaMx41 <i>orf24</i> (94 a.a. protein) with <i>acrVIA1</i>                                              | This study    |
| pJG076         | pHERD30T with $\Phi$ KZ <i>orf39</i>                                                                                                            | This study    |
| pJG077         | pHERD30T with HDR cassette to fuse $\Phi$ KZ <i>orf54</i> with <i>mCherry</i> at the C terminus                                                 | This study    |
| pJG078         | pHERD30T with HDR cassette to substitute $\Phi$ KZ <i>orf89</i> , <i>orf90</i> , <i>orf91</i> , <i>orf92</i> , <i>orf93</i> with <i>acrVIA1</i> | This study    |
| pJG079         | pHERD30T with HDR cassette to fuse $\Phi$ KZ <i>orf93</i> with <i>mNeonGreen</i> at the C terminus                                              | This study    |

|        |                                                                                                    |            |
|--------|----------------------------------------------------------------------------------------------------|------------|
| pJG084 | pHERD30T with HDR cassette to fuse $\Phi$ KZ <i>orf39</i> with <i>mCherry</i> at the N terminus    | This study |
| pJG085 | pHERD30T with HDR cassette to fuse $\Phi$ KZ <i>orf39</i> with <i>mNeonGreen</i> at the N terminus | This study |

Table S3. crRNA sequences.

| Phage         | Target        | Type                    | No.                     | Sequence (5' - 3')                 |
|---------------|---------------|-------------------------|-------------------------|------------------------------------|
| JBD30         | <i>orf38</i>  | VI-A                    |                         | acgccaatctctgctacgacggtc           |
| ΦKZ           | <i>orf54</i>  | VI-A                    | #1                      | tcaaactcaagctactgctcctgc           |
|               |               |                         | #2                      | atgctcggtcagcagatgccctac           |
|               |               |                         | #3                      | ggatggctggctactcattgtt             |
|               | <i>orf120</i> |                         | #1                      | cttaagccgtgagctggaaagggt           |
|               |               |                         | #2                      | gctgatcttaagccgtgagctgga           |
|               |               |                         | #3                      | agcttgctgatcttaagccgtgag           |
| <i>orf146</i> | #1            | tcatactgggttgaactaatga  |                         |                                    |
|               | #2            | ggcttctgcattgaagattatgt |                         |                                    |
| PaMx41        | <i>orf11</i>  | VI-A                    | #1                      | ccaccctgaatcctcaagaactca           |
|               |               |                         | #2                      | agactggctgatctcggctgcta            |
|               |               |                         | #3                      | aaagagcgcgtatatctgaccgcc           |
|               |               |                         | #4                      | gtcaagcgtcagactggctgatc            |
|               |               |                         | #5                      | tcaatctaccgtcaagcgtcaga            |
|               |               |                         | #6                      | ctcggctgctatcatcgctgcgaa           |
|               | <i>orf04</i>  | I-C                     | #1                      | tgatacgaaggaaattgctgcaattggcgataga |
|               |               |                         | #2                      | atttctgacttaatagggaggccgaattccata  |
|               | <i>orf14</i>  | I-F                     | #1                      | tctcagcgtaatagtctgttcttctggcag     |
|               |               |                         | #2                      | ttcttctatttctccagaatcttccgcaat     |
|               | <i>orf06</i>  | II-A                    | #1                      | tttattactgttgaccctgc               |
|               |               |                         | #2                      | ttccagcatagttctatac                |
|               | <i>orf20</i>  | V                       | #1                      | tggagaatgaagaaggtaaggta            |
| #2            |               |                         | agaatatgccttgcataggatag |                                    |
| <i>orf23</i>  | V             | #1                      | tggagaatgaagaaggtaaggta |                                    |
|               |               | #2                      | agaatatgccttgcataggatag |                                    |
| <i>orf46</i>  | V             | #1                      | tggagaatgaagaaggtaaggta |                                    |
|               |               | #2                      | agaatatgccttgcataggatag |                                    |

**Table S4. Primers.**

| No.   | Description                                                                   | Name              | Sequence (5' - 3')                                              |
|-------|-------------------------------------------------------------------------------|-------------------|-----------------------------------------------------------------|
| JG003 | mNeonGreen                                                                    | mGreen-F          | CCAATATTCTCGAGGGTGGCGGTGGCTCGATGGTGAGCAAGGGCG                   |
| JG004 |                                                                               | mGreen-pHERD-R    | GACTCTAGAGGATCCCCGGGTACCTTACTTGTACAGCTCGTCC                     |
| JG010 | gp93                                                                          | IB3-Sacl-F        | AGCATC GAATTCGAGCTCC ATGTCTCTACTTAAAATGCT                       |
| JG011 |                                                                               | IB3-XhoI-R        | AGCATC CTCGAG CTTCTCATCATTCTCAGGTG                              |
| JG075 | H1 for insertion at gp120 3'UTR (contains point mutations to avoid targeting) | pHERD-gp120H1-F   | CCATGGGATCTGATAAGAATTC CTAGG GTAATGCGTCCGACCTATCG               |
| JG064 |                                                                               | gp120-muH1stop-R  | GATCATTTTTTATTTCCTACGTAGG CTCGAG<br>CTAAGGTTTTAAGTCGGCAAGCTTACC |
| JG029 | H2 for insertion at gp120 3'UTR                                               | gp120-H2-KpnI-F   | AGCATC GGTACC CATATG GCTGGAAAGGGTTACCGTTA                       |
| JG030 |                                                                               | gp120-H2-Sall-R   | AGCATC GTCGAC CAACAAAACGTGAGACAGGG                              |
| JG046 | Check insertion at gp120 3' UTR                                               | CheckFP-inphage-R | AGTGCTTCTTCTTCTGGACTAAGTC                                       |
| JG047 |                                                                               | CheckFP-inphage-F | GTGGTACTATCAGCCTATCCAAAGG                                       |
| JG065 | AcrVIA1                                                                       | AcrVIA1-XhoI-F    | AGGCCCTCTCGAG CCTACGTAGGAATAAAAA ATGATCTACTATATAAAAG            |
| JG066 |                                                                               | AcrVIA1-NdeI-R    | CGGCCCTCATATG TTAATTTAGCTCCTCTTTTA                              |
| JG088 | Check the existence of AcrVIA1                                                | AcrVIA1-mid-F     | TCCGTTTCGCTCCCGATACGA                                           |
| JG095 | H1 for mCherry-gp54 fusion                                                    | pHERD-Op24NheI-F  | GCCTTTTGCTGGCCTTTTGCTCACATAAG<br>TTGAAGACCCGCCACTATATTTAGG      |
| JG096 |                                                                               | Op24H1-AcrVIA-R   | CACTTTTAAATCTTTTATATAGTAGATCAT TTTAAATACCTTTACGATTATGG          |
| JG097 | AcrVIA1 for mCherry-gp54 fusion                                               | Op24H1-AcrVIA-F   | CAAGAAACCATAATCGTAAAGGTATTTAAA ATGATCTACTATATAAAAGA             |
| JG098 |                                                                               | AcrVIA-mCherry-R  | CACCATTTTTTATTTCCTACGTAGGCCTAGG TTAATTTAGCTCCTCTTTTA            |
| JG099 | H2 for mCherry-gp54 fusion                                                    | AcrVIA-mCherry-F  | AATTAACCTAGGCCTACGTAGGAATAAAAA ATGGTGAGCAAGGGCGAGGA             |
| JG100 |                                                                               | pHERD-gp54NheI-R  | TGCTCTGCGAGGCTGGCCGATAAGCTAG<br>ATGTGGGTCGCAATAGAGAACGGAG       |
| JG104 | H1 for gp54-gfp11 fusion                                                      | pHERD-gp54end-F   | GCCTTTTGCTGGCCTTTTGCTCACATAAG GAGCAAGTCATCCTAGATGCA             |
| JG105 |                                                                               | gp54end-gfp11-R   | CATGTGGTCACGCGAGCCGCCCGACCCGCC GTACCAGGTACCCGGTGCAT             |
| JG106 | H2 for gp39 deletion                                                          | KO39H2-F          | ATTAACTTATACTGGAGCCCTTCGG                                       |
| JG107 |                                                                               | pHERD-KO39H2-R    | TGCTCTGCGAGGCTGGCCGATAAGCTAG CTTTTTAGCAGTGTCTTTGCC              |

|       |                                             |                                                           |                                                            |
|-------|---------------------------------------------|-----------------------------------------------------------|------------------------------------------------------------|
| JG050 |                                             | gp54-mid-R                                                | CAGTGGTCGGAGTCCAATGTAGATC                                  |
| JG108 | Check gp54 editing                          | Check-recomb54-F                                          | AGTTTGAGGACCAAGTGTAACACC                                   |
| JG118 |                                             | Check-KO54-R                                              | GTGGGTTAATTAGGCTACGTACGTG                                  |
| JG110 |                                             | pHERD-gp54NheI-F                                          | GCCTTTTGCTGGCCTTTTGCTCACATAAG CTGCATTTTATAAAAATACTG        |
| JG111 |                                             | pHERD-gp54NheI-R                                          | TGCTCTGCGAGGCTGGCCGATAAGCTAG TTAGTACCAGGTACCCGGT           |
| JG127 | gp54                                        | gp54-PstI-F                                               | AGCATC CTGCAG ATGGCTGTTAACGAAAACGA                         |
| JG128 |                                             | gp54-SacI-R                                               | AGCGTC GAGCTC TTAGTACCAGGTACCCGGTGCATTATAG                 |
| JG112 | AcrVIA1 for gp54 deletion (pair with JG097) | AcrVIA-Op24H2-R                                           | TAACATCCCTATCTACCGAGGTATTTCTTA TTAATTTAGCTCCTCTTTTA        |
| JG113 |                                             | AcrVIA-Op24H2-F                                           | GCAAACAAATTTTAAAAGAGGAGCTAAATTA TAGGAAATACCTCGGTAGATAGG    |
| JG114 | H2 for gp54 deletion                        | pHERD-Op24H2NheI-R                                        | TGCTCTGCGAGGCTGGCCGATAAGCTAG CTTTCTCATCTGAGTTAC            |
| JG119 | H2 for gp93 deletion                        | KO93H2-F                                                  | CAAACATAATGAGGAACCCCTTCGG                                  |
| JG120 |                                             | pHERD-KO93H2-R                                            | TGCTCTGCGAGGCTGGCCGATAAGCTAG CATAAAAGCAGCTGATTGTTTA        |
| JG121 | Check gp93 deletion                         | Check-KOgp93-R                                            | AGTTAGTACACGCTGTGCCGCT                                     |
| JG122 | gp39                                        | pHERD-gp39-NheI-F                                         | GCCTTTTGCTGGCCTTTTGCTCACATAAG ATTATATTAATCACAATGAGG        |
| JG123 |                                             | pHERD-gp39-NheI-R                                         | TGCTCTGCGAGGCTGGCCGATAAGCTAG TTAATCGAATACAAGACCACTACT      |
| JG124 | H1 for gp241-gp242 deletion                 | pHERD-KO2412-H1Acr-F                                      | GCCTTTTGCTGGCCTTTTGCTCACATAAG TTAATAAAGATAACTTCTTTTC       |
| JG125 |                                             | KO2412-H1Acr-R                                            | CCTTTTAGTTAATTTAATTTAGCTCCTCTTTTAAAATTTG                   |
| JG126 | Check gp241-gp242 deletion                  | Check-KO2412-R                                            | GGCTAAGTCTTTTTCTCGATACTGG                                  |
| JG133 | Operon#24                                   | pHERD-Op24NheI-F                                          | GCCTTTTGCTGGCCTTTTGCTCACATAAG TACGTGACGGAGCATTCTTAAATA     |
| JG134 |                                             | pHERD-Op24NheI-R                                          | TGCTCTGCGAGGCTGGCCGATAAGCTAG CCCGAAGGAGCCGCTATATCAG        |
| JG135 |                                             | H1 for insertion at the 3'UTR of the capsid gene in OMKO1 | OmK-capH1-GibsonF                                          |
| JG136 |                                             | OmK-capmuH1-GibsonR                                       | GATCATTTTTTATTCTACGTAGG GCTAGC CTAAGGTTTTAAGTCGGCAAGCTTACC |
| JG137 | H1 for insertion at gp54 5'UTR              | pHERD-Op24InH1-F                                          | GCCTTTTGCTGGCCTTTTGCTCACATAAG GGAGCATTCTTAAATAAATTA        |
| JG138 |                                             | Op24InH1-RBS-R                                            | GATCATTGTATATTCTATTGTAAT CTCGAG CGTAACGAACACTATGTT         |

|       |                                     |                    |                                                                  |
|-------|-------------------------------------|--------------------|------------------------------------------------------------------|
| JG139 | AcrVIA1 for insertion at gp54 5'UTR | gp53RBS-AcrVIA1-F  | CTCGAG ATTACAAATAGGAATATACA ATGATCTACTATATAAAAAGA                |
| JG140 |                                     | AcrVIA1-Op24InH2-R | CGCTATAATCTGCTATCAGCAGAT CCTAGG TTAATTTAGCTCCTCTTTTA             |
| JG141 | H2 for insertion at gp54 5'UTR      | AcrVIA1-Op24InH2-F | AGGAGCTAAATTAA CCTAGG ATCTGCTGATAGCAGATTATAGCG                   |
| JG142 |                                     | pHERD-Op24InH2-R   | TGCTCTGCGAGGCTGGCCGATAAGCTAG GTTGTAAACGGTTCGGTAG                 |
| JG146 | H1 for gp146 deletion               | pHERD-KOgp146H1-F  | GCCTTTTGCTGGCCTTTTGCTCACATAAG AGCTATTGCAAATGCGGTACC              |
| JG147 |                                     | KOgp146H1-AcrR     | TAGATCATTTTTATTTCTTGCTGTATAAGAA<br>CATTATACTACTTCTCAAGTTCCG      |
| JG148 | Check gp146 deletion                | Check-gp146edit-R  | AATCTATCCCAGTTC AAGCTAAGCC                                       |
| JG152 | AcrVIA1 for gp146 deletion          | gp145RBS-AcrVIA1-F | TTCTTATACAGCAAGGAAATAAAA ATGATCTACTATATAAAAAGAT                  |
| JG153 |                                     | AcrVIA1-Op63InH2-R | GGAGGGCAATATGTCGTT TTAATTTAGCTCCTCTTTTAAAAT                      |
| JG154 | H2 for gp146 deletion               | AcrVIA1-Op63InH2-F | AAAGAGGAGCTAAATTAA AACGACATATTGCCCTCCCTTCGG                      |
| JG155 |                                     | pHERD-Op63InH2-R   | TGCTCTGCGAGGCTGGCCGATAAGCTAG<br>ATTCCATTTATTATTCAATTAATAGCT      |
| JG156 | gp146                               | pMMB-gp146-GbF     | GGAAACAGAATTAATTAAGCTTGCATGC CTGCAG<br>ATGGCTTCTGCATTTGAAGA      |
| JG157 |                                     | pMMB-gp146-GbR     | CCGCCAAAACAGCCAAGCTGAATTC GAGCTC TTAATAACAGCACCTTTGG             |
| JG160 | H2 for gp241 deletion               | AcrVIA1-KO241H2-F  | CAAACAAATTTTAAAAGAGGAGCTAAATTAATAAGAGCATATGGCCCTCCCTT<br>CGG     |
| JG161 |                                     | pHERD-KO241H2-R    | TGCTCTGCGAGGCTGGCCGATAAGCTAG TAATAGTGGTATTAACCTTGTAG             |
| JG162 | Check gp241 deletion                | Check-KOgp241-R    | CGGGTGTAATCGTACGTAGATCAATCGC                                     |
| JG166 | H2 for gp241-gp242 deletion         | KO2412-H2-F        | GAGGAGCTAAATTAATTAACATAAAAGGTAAAAAATGAATAATC                     |
| JG167 |                                     | pHERD-KO2412-H2-R  | TGCTCTGCGAGGCTGGCCGATAAGCTAG CATCCTTATTATGGAAGCTATA              |
| JG168 | Check orf24 deletion in PaMx41      | Check-PaM24-R      | CTCGTGGTGATGTTAACCTAGGG                                          |
| JG169 |                                     | Check-PaM24-F      | CAACTCTGAATTCCGAAGTGAAGCC                                        |
| JG170 | Check gp93 deletion                 | Check-KOgp93-F     | ACTCTTGATATCCAATCTGTAGCGG                                        |
| JG173 | gp39                                | gp39-Sacl-F        | ACCCATGGGATCTGATAAGAATTCGAGCTC<br>ATGATGTCTAAAGTAAAACTCG         |
| JG174 |                                     | gp39-KpnI-R        | CAGGTCGACTCTAGAGGATCCCCGGGTACC<br>TTAATCGAATACAAGACCACTACT       |
| JG175 |                                     | pHERD-KOOp42H1-F   | GCCTTTTGCTGGCCTTTTGCTCACATAAG<br>TAACCTACCTTCTTTTACTAATGCAGAATAG |



|         |                                        |                     |                                                                                    |
|---------|----------------------------------------|---------------------|------------------------------------------------------------------------------------|
| JG176   | H1 for Operon#42 deletion              | KOop42H1-R          | CTTTTAAATCTTTTATATAGTAGATCAT<br>TTTTCTTCTTCTATATGGGTTTGCAGAG                       |
| JG178   | gfp1-10                                | pHERD-gfp10-GbF     | ACCCATGGGATCTGATAAGAATTC GAGCTC ATGGTGAGCAAGGGCGAGGA                               |
| JG179   |                                        | pHERD-gfp10-GbR     | GGCCAGTGCCAAGCTTGCATGC CTGCAG CTTCTCGTTGGGGTCTTTGCTC                               |
| JG180   | Check gfp11-gp54 and gp54-gfp11 fusion | gfp11-mid-F         | TGGTCCTTCATGAGTATGTAAATGC                                                          |
| JG181   | Check gp39 deletion                    | Check-KOgp39-R      | CTTCAGCCCATTTGTCTACCCG                                                             |
| JG182   | H1 for gp93-mNeonGreen fusion          | gp93-mNGH1-Gb-F     | GCCTTTTGCTGGCCTTTTGCTCACATAAG<br>AATCCGAAGACTATTGCAGACTTCA                         |
| JG183   |                                        | gp93-mNGH1-Gb-R     | CTATATGGGTTTGC GGTTCCCTCATTATGTTTGTTA<br>TTACTTGTACAGCTCGTCCAT                     |
| JG186   | Check Operon#42 deletion               | Check-KOop42-F      | CACCAATAAAGTCACCAGTACGTCC                                                          |
| JG187   | Check gp93-mNeonGreen fusion           | gp93-mid-F          | GCCCTAGCTGATTGGAATCCTGACG                                                          |
| JG195   | H1 for FP-gp39 fusion                  | FP-gp39H1-F         | GCCTTTTGCTGGCCTTTTGCTCACATAAGTTTAATTTGAAAATAGAAAAATTG<br>G                         |
| JG196   |                                        | FP-gp39H1-R         | CCATTACACCTCATTGTGATTAATATAATTTAATTTAGCTCCTCTTTTAAAATTT<br>G                       |
| JG197   | H2 for FP-gp39 fusion                  | FP-gp39H2-F         | TAAATTATATTAATCACAATGAGGTGTAATGGTGAGCAAGGGCGAGGAGG                                 |
| JG198   |                                        | FP-gp39H2-R         | TGCTCTGCGAGGCTGGCCGATAAGCTAGAAGACTTTGGTGTCTTGATTA                                  |
| oSDM455 | pHERD30T-crRNA Version 3               | Lse_crRNA_V3_Top    | ACTCTCTACTGTTTCTCCATGGTAAGAGACTACCTCTATATGAAAGAGGACTA<br>AAACCGA                   |
| oSDM456 |                                        | Lse_crRNA_V3_Bot    | CGGGTACCGAGCTCGAATTCGAGACCGTACGTACGTGGTCTCGGTTTTAGT<br>CCTCTTTCA                   |
| oSDM457 | pHERD30T-crRNA Version 2               | p30T_TSS-R          | ATGGAGAAACAGTAGAGAGTTG                                                             |
| oSDM458 |                                        | p30T_TSS-F          | GAATTCGAGCTCGGTACC                                                                 |
| oSDM465 |                                        | LseCas13 crRNA V2 F | ACTCTCTACTGTTTCTCCATGGTAAGAGACTACCTCTATATGAAAGAGGACTA<br>AAACCGAGACCACGTACGTACGGTC |
| oSDM466 |                                        | LseCas13 crRNA V2 R | CGGGTACCGAGCTCGAATTCGTTTTTGTGGAGATTCATATTCTCCAAGTCTC<br>TTACCGGAGACCGTACGTACGTGGTC |

## References

1. Stover, C.K., Pham, X.Q., Erwin, A.L., Mizoguchi, S.D., Warrener, P., Hickey, M.J., Brinkman, F.S., Hufnagle, W.O., Kowalik, D.J., Lagrou, M., et al. (2000). Complete genome sequence of *Pseudomonas aeruginosa* PAO1, an opportunistic pathogen. *Nature* 406, 959-964.
2. Mendoza, S.D., Nieweglowska, E.S., Govindarajan, S., Leon, L.M., Berry, J.D., Tiwari, A., Chaikerasitak, V., Pogliano, J., Agard, D.A., and Bondy-Denomy, J. (2020). A bacteriophage nucleus-like compartment shields DNA from CRISPR nucleases. *Nature* 577, 244-248.
3. Qiu, D., Damron, F.H., Mima, T., Schweizer, H.P., and Yu, H.D. (2008). PBAD-based shuttle vectors for functional analysis of toxic and highly regulated genes in *Pseudomonas* and *Burkholderia* spp. and other bacteria. *Appl Environ Microbiol* 74, 7422-7426.
4. Meeske, A.J., Jia, N., Cassel, A.K., Kozlova, A., Liao, J., Wiedmann, M., Patel, D.J., and Marraffini, L.A. (2020). A phage-encoded anti-CRISPR enables complete evasion of type VI-A CRISPR-Cas immunity. *Science* 369, 54-59.
