# Supplementary material
Source: PubMed Central journal article supplement (PMC9722621)

Unprocessed agarose gels

"*Δorf54*"

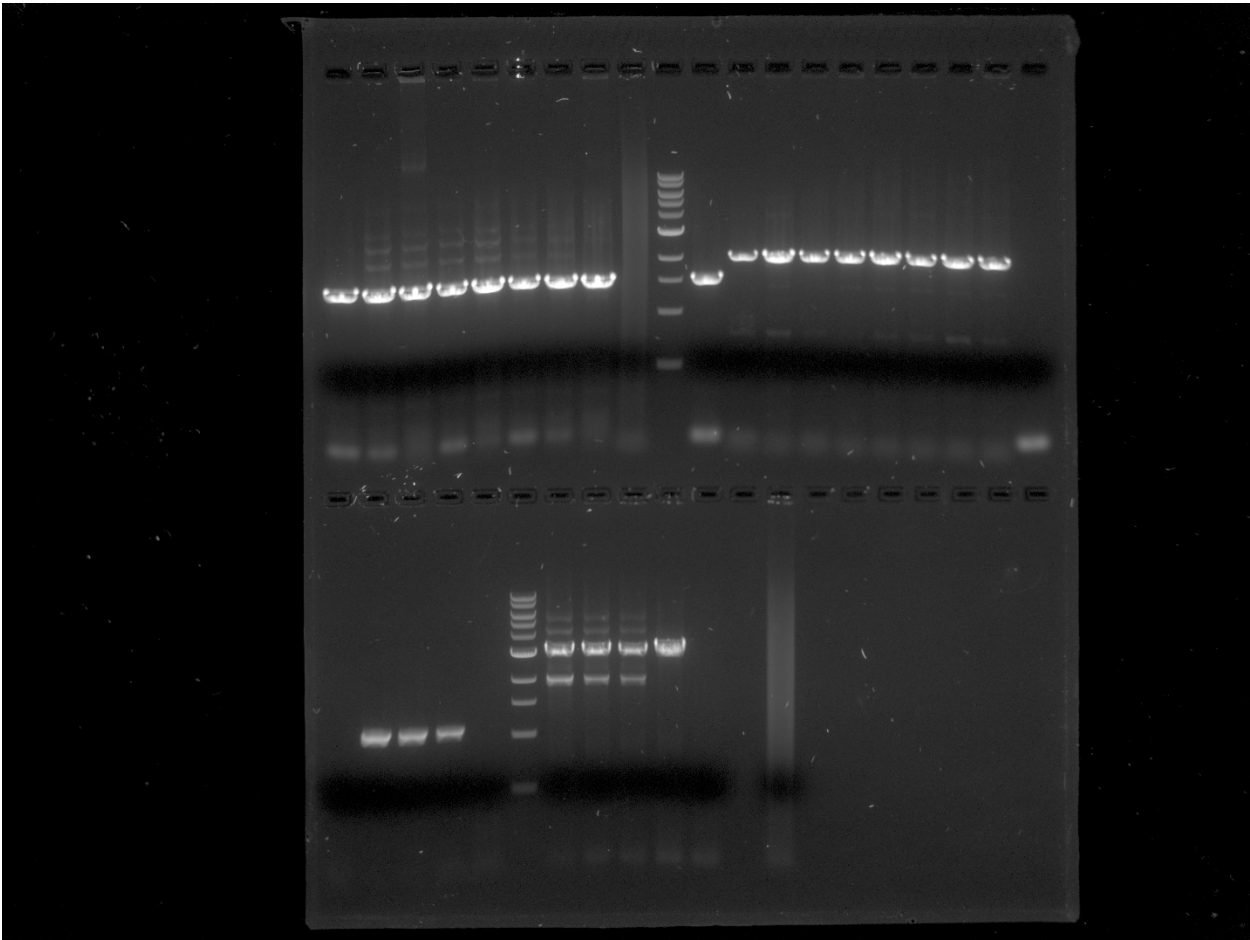

*"FP-orf54"*

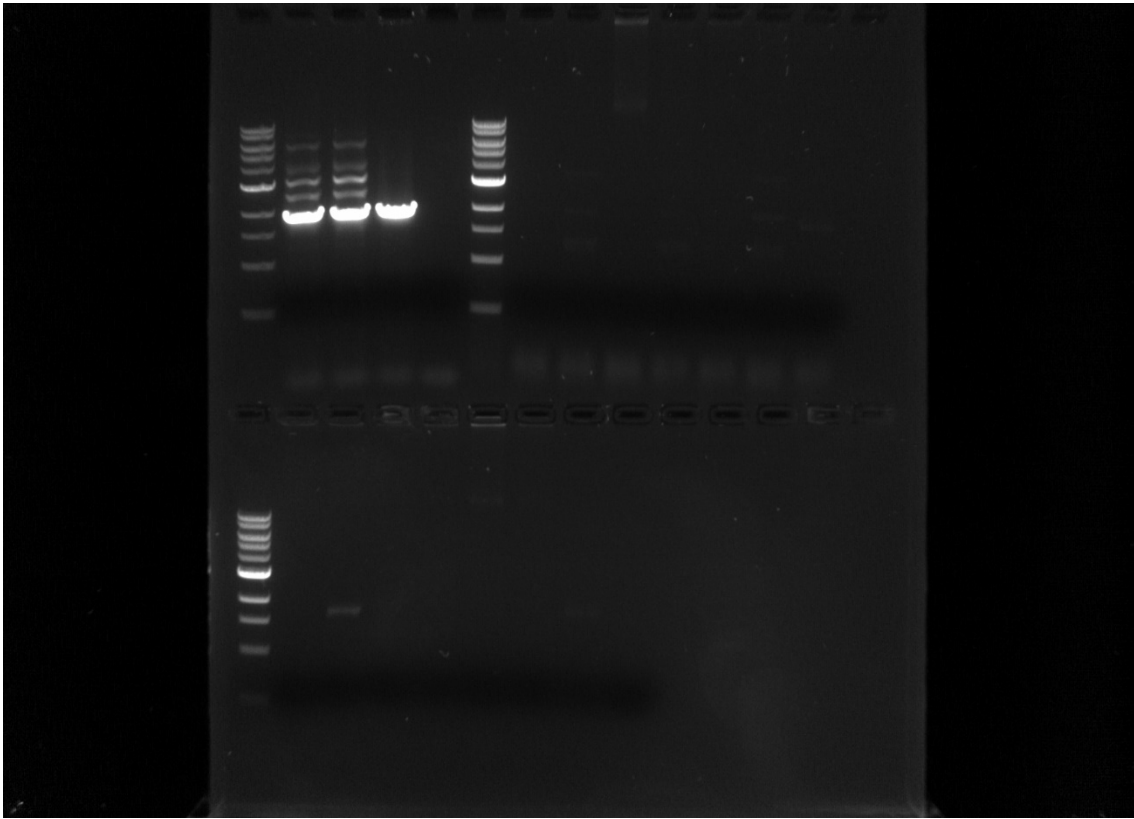

*"orf54-FP"*

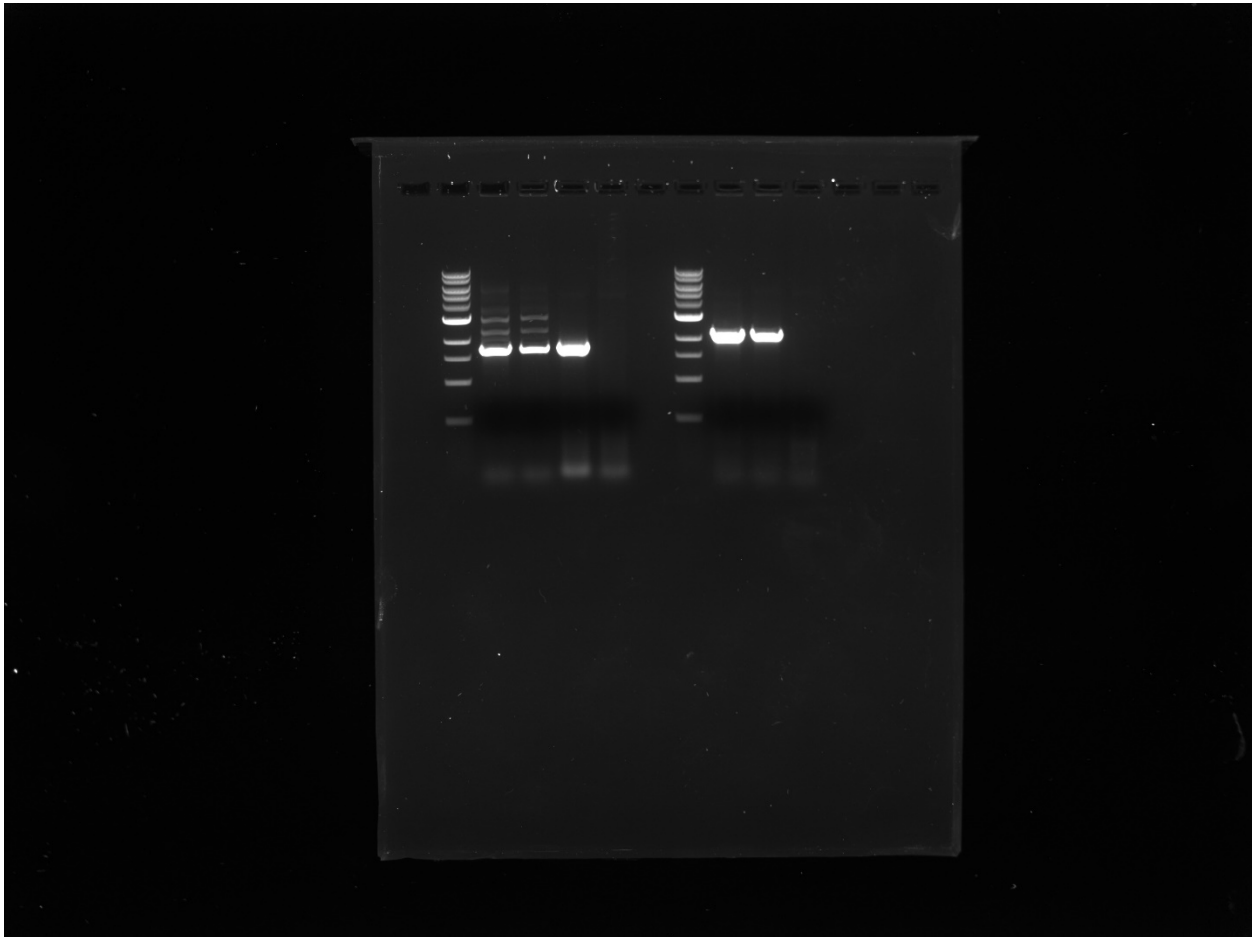

Supplement: NIHMS1841059-supplement-1841059_SD_ED_Fig_6.pdf [file NIHMS1841059-supplement-1841059_SD_ED_Fig_6.pdf]

Unprocessed agarose gels

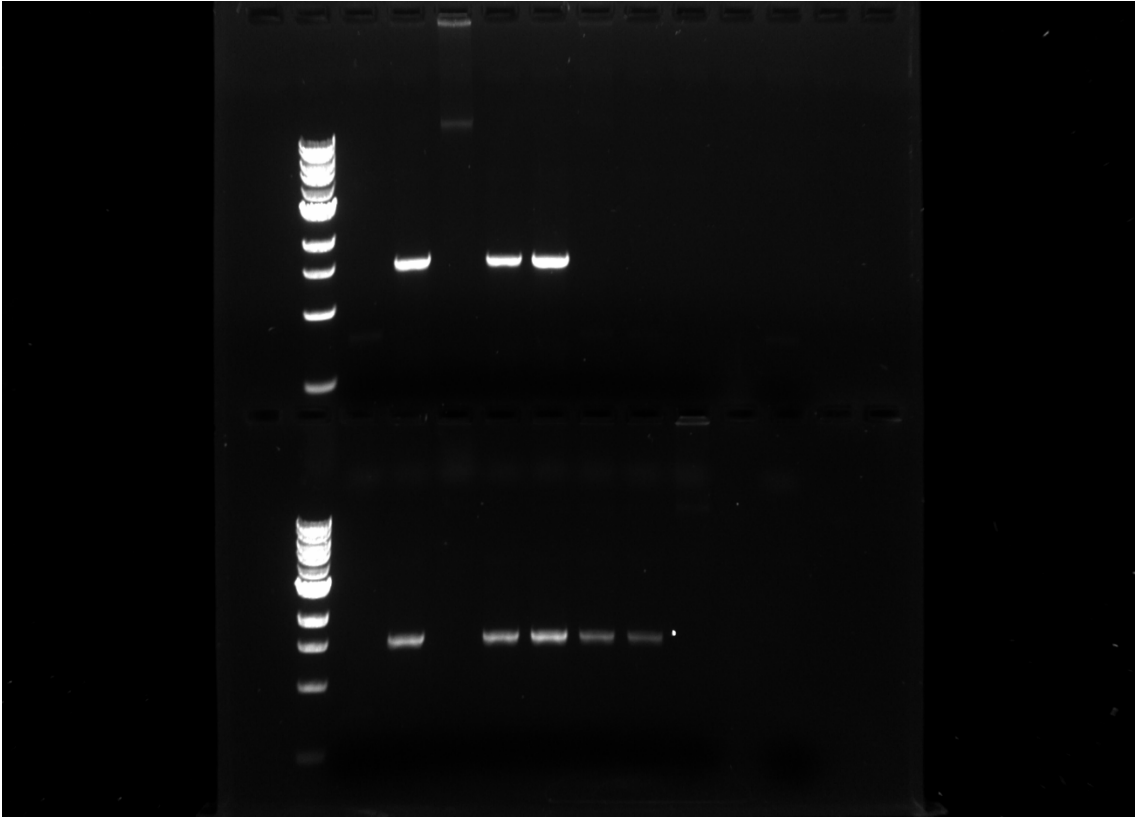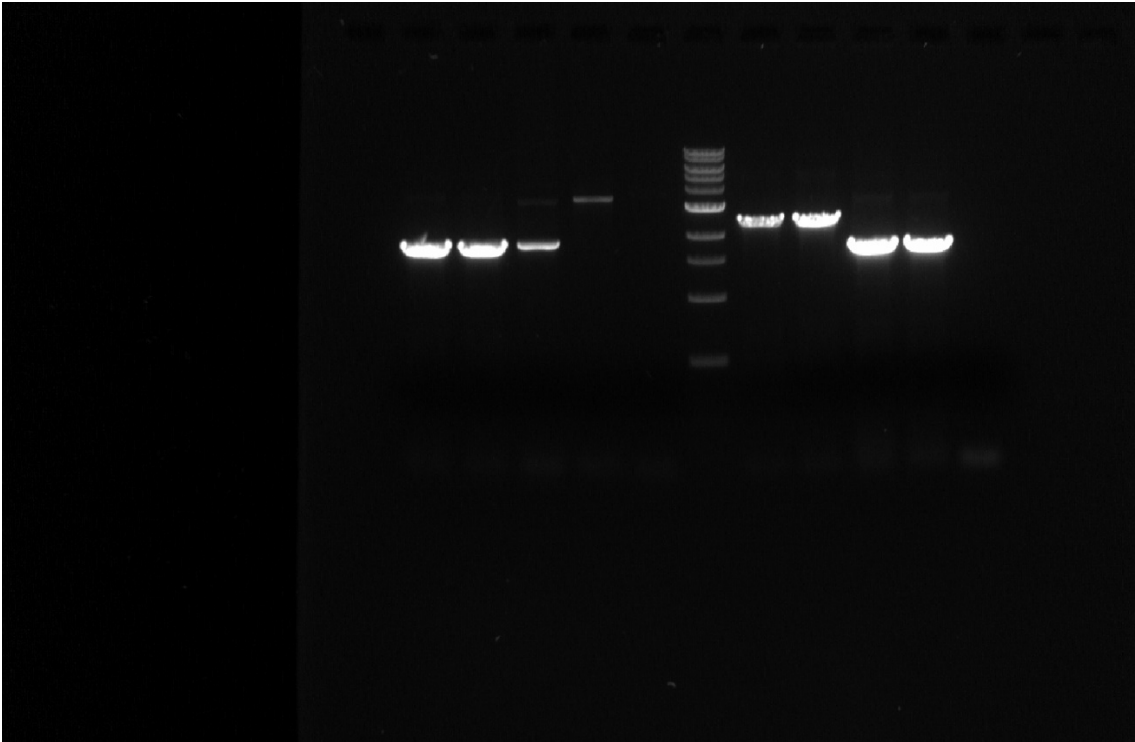

Supplement: NIHMS1841059-supplement-1841059_SD_Fig_1.pdf [file NIHMS1841059-supplement-1841059_SD_Fig_1.pdf]
